# Supplementary material
Source: MDPI journal article supplement (https://www.mdpi.com/2304-6740/11/7/304)
Supplement: s1 [file s1]

## Electronic Supplementary Information

### **Transannular Selenocyclofunctionalization of 1,5-cyclooctadiene: The Antioxidant Properties of 9-selenabicyclo[3.3.1]nonane Derivatives and the Discovery of Increasing Both GPx and GR Activities**

**Maxim V. Musalov<sup>1\*</sup>, Irina S. Kapustina<sup>2</sup>, Ekaterina V. Spiridonova<sup>2</sup>, Natalya V. Ozolina<sup>2</sup>, Svetlana V. Amosova<sup>1</sup>, Tatyana N. Borodina<sup>1</sup> and Vladimir A. Potapov<sup>1</sup>**

<sup>1</sup> A. E. Favorsky Irkutsk Institute of Chemistry, Siberian Division of The Russian Academy of Sciences,  
1 Favorsky Str., Irkutsk 664033, Russia; amosova@irioch.irk.ru (S.V.A.); borodina@irioch.irk.ru (T.N.B.);  
v.a.potapov@mail.ru (V.A.P.)

<sup>2</sup> Siberian Institute of Plant Physiology and Biochemistry, Siberian Division of The Russian Academy of  
Sciences, 132 Lermontov Str., Irkutsk 664033, Russia; nirinka24@mail.ru (I.S.K.); yatakol@mail.ru (E.V.S.);  
ozol@sifibr.irk.ru (N.V.O.)

\* Correspondence: musalov\_maxim@irioch.irk.ru

#### **Table of Contents**

|                                                                          |    |
|--------------------------------------------------------------------------|----|
| Experimental                                                             | 2  |
| <sup>1</sup> H and <sup>13</sup> C NMR spectra of the obtained compounds | 3  |
| X-ray crystallographic data                                              | 8  |
| Evaluation diene conjugates                                              | 10 |
| Glutathion reductase activity                                            | 11 |
| Glutathione peroxidase activity                                          | 12 |
| References                                                               | 13 |

## Experimental

$^1\text{H}$  (400.1 MHz),  $^{13}\text{C}$  (100.6 MHz) NMR spectra were recorded on a Bruker DPX-400 spectrometer in 1–10% solution in  $\text{D}_2\text{O}$ ,  $\text{CDCl}_3$ ,  $\text{DMSO}-\text{D}_6$ , referenced to  $i$ -PrOH, HMDS ( $^1\text{H}$  and  $^{13}\text{C}$  NMR, internal).

### Crystal Structure Determination

Data were collected on a BRUKER D8 VENTURE PHOTON 100 CMOS diffractometer with  $\text{MoK}\alpha$  radiation ( $\alpha = 0.71073 \text{ \AA}$ ) using the  $\varphi$  and  $\omega$  scans technique. Using Olex2 [1], the structure was solved with the ShelXS [2] structure solution program using Direct Methods and refined with the XL [2] refinement package using Least Squares minimisation. Data were corrected for absorption effects using the multi-scan method (SADABS). All non-hydrogen atoms were refined anisotropically using SHELX [2]. The coordinates of the hydrogen atoms were calculated from geometrical positions.

### Plant material

Studies were carried out in laboratory conditions on oilseed radish seeds (*Raphanus sativus* L. var. *oleiferus* Metzg.) of lines of Irkutsk State Agricultural Academy, with laboratory germinability of 80-98%, weighing 1,000 seeds 9.5g. Seeds were germinated on wet filter paper in Petri dishes at a constant temperature of 23 °C, in the dark, for 4 days, wetting them with the test solutions. The number of seeds in one cup was 30pcs. The experiment was repeated 3 times.

### Evaluation of germinability and mass of seedlings

Germinability was analyzed according to the All-Union State Standard 10-14-86 "Oilseed Radish Seeds. Varietal and sowing qualities". These indicators were determined in accordance with All-Union State Standard 12038-84 "Seeds of agricultural crops. Methods for determining germinability" [3]. The mass of shoots and roots was determined using the gravimetric analysis.

### Determination of protein content

Protein content was determined by the degree of binding to the Coomassie blue dye (CBB G250 "Sigma") according to the Bradford method [4].

### Determination of glutathione reductase activity

Glutathione reductase activity (EC 1.6.4.2) was measured according to the method described by Nigmatullina et al. [5]. The activity of glutathione reductase was determined by the change in absorption at 340 nm, caused by the oxidation of NADPH in 3.5 min with an interval of 1 s on the spectrophotometer. The enzyme activity was calculated using the extinction coefficient for  $\text{NADP}^+$  at a wavelength of 340 nm, equal to  $6.22 \text{ mmol}^{-1}\text{cm}^{-1}$ .

### Evaluation of diene conjugates

Analysis of the content of the primary products of lipid peroxidation – diene conjugates (DC) – was carried out according to the method in our modification [6]. The measurement was performed on a spectrophotometer at a wavelength of 203 nm. The obtained optical density (D) was used to calculate the concentration of diene conjugates (recalculated per 1 g wet mass) using an extinction coefficient equal to  $2.2 \times 10^5 \text{ mol}^{-1}\text{cm}^{-1}$ . Salinisation was chosen as a stress, which was created with NaCl, a concentration of 200 mmol was taken from literature data [7]. This concentration causes stress, since it significantly increases the level of lipid peroxidation by almost two times compared with the control.

### Statistics

The data are presented as arithmetic mean values of quantities and their standard deviations, which were obtained in three independent experiments, calculated using Microsoft Excel.

# <sup>1</sup>H and <sup>13</sup>C NMR spectra of the obtained compounds

<sup>1</sup>H NMR SPECTRUM OF COMPOUND **3**, CDCl<sub>3</sub>, REFERENCED TO HMDS (INTERNAL)

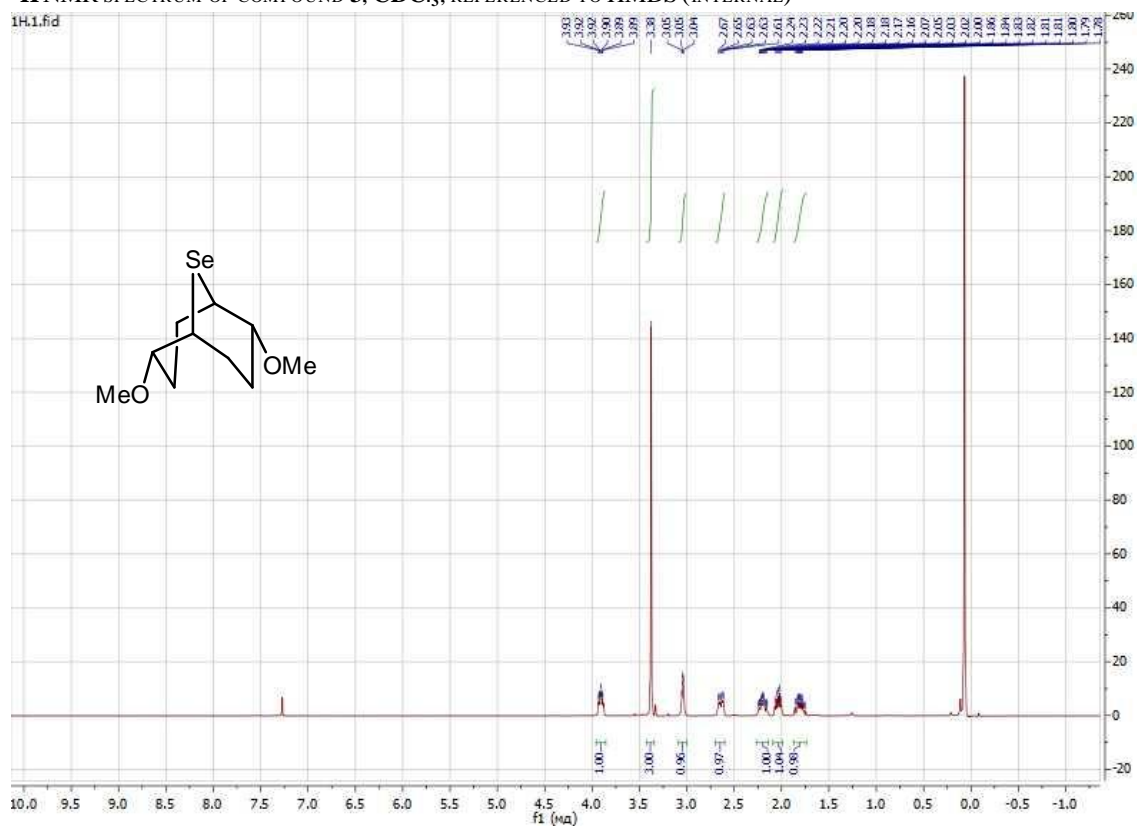

<sup>13</sup>C NMR SPECTRUM OF COMPOUND **3**, CDCl<sub>3</sub>, REFERENCED TO HMDS (INTERNAL)

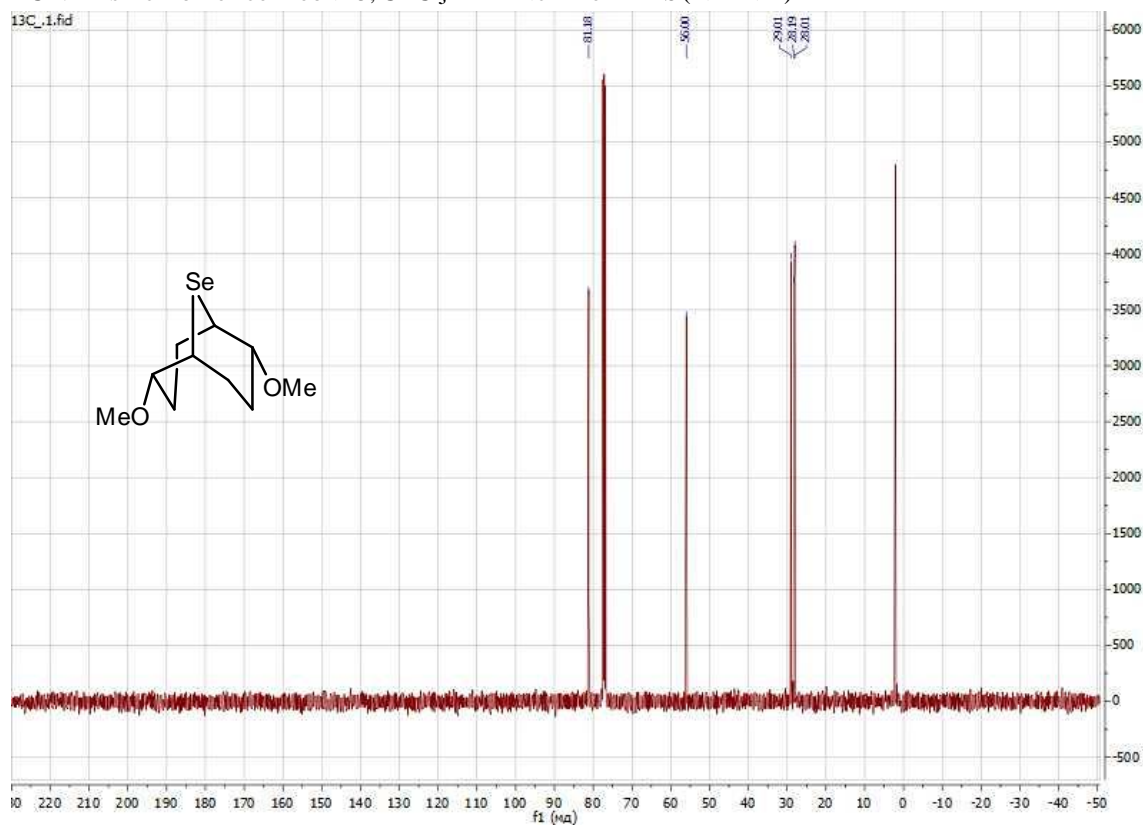

<sup>1</sup>H NMR SPECTRUM OF COMPOUND **5**, CDCl<sub>3</sub>, REFERENCED TO HMDS (INTERNAL)

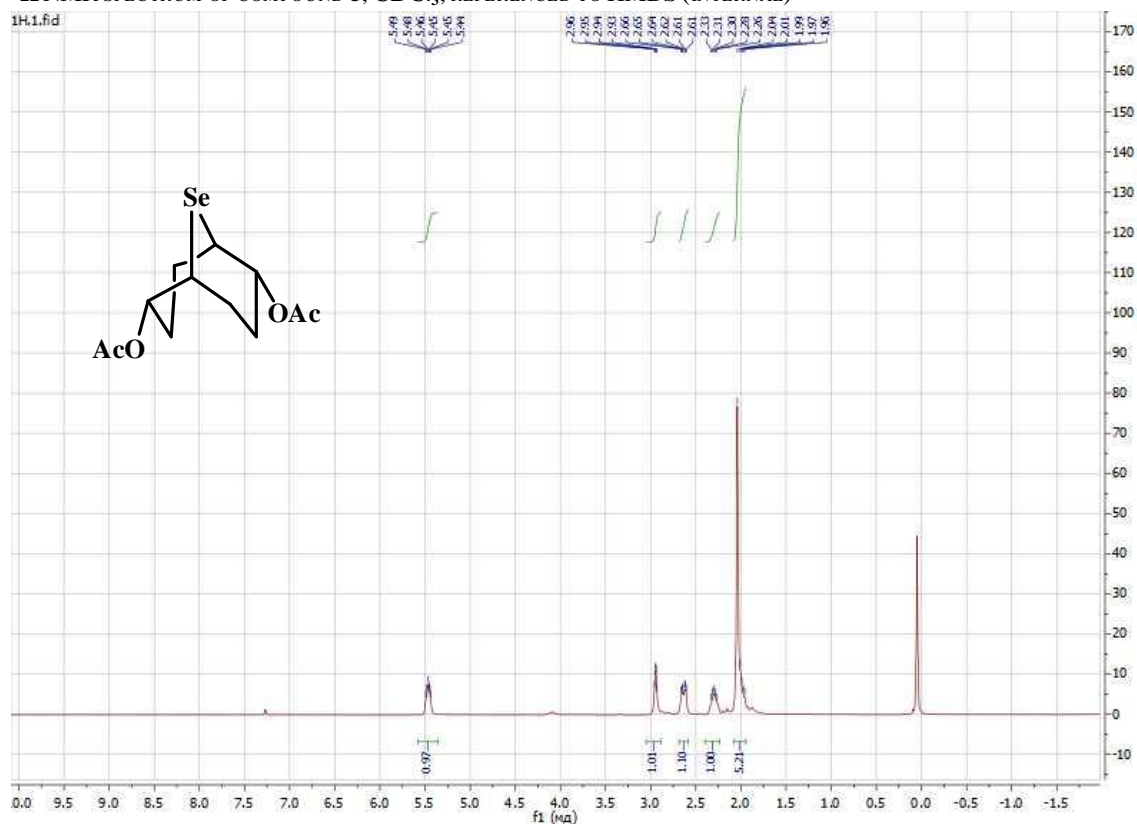

<sup>13</sup>C NMR SPECTRUM OF COMPOUND **5**, CDCl<sub>3</sub> REFERENCED TO HMDS (INTERNAL)

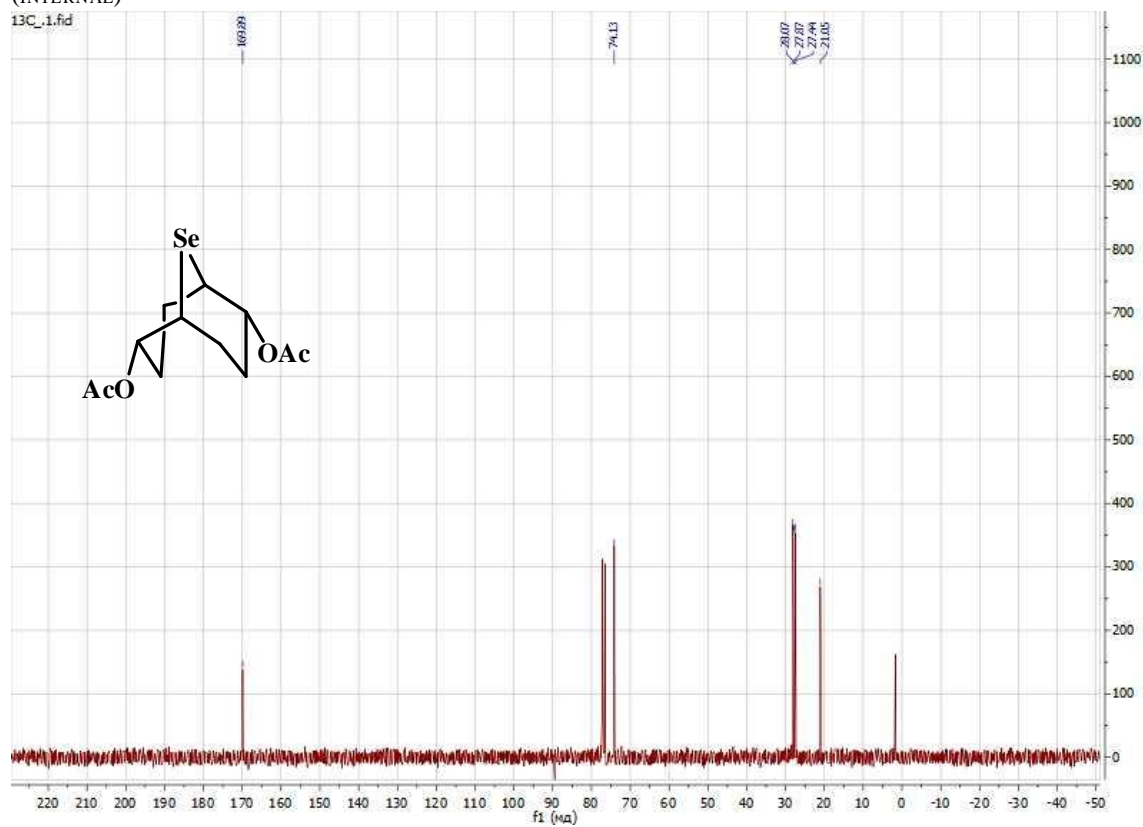

<sup>1</sup>H NMR SPECTRUM OF COMPOUND **6**, D<sub>2</sub>O REFERENCED TO i-PrOH (INTERNAL)

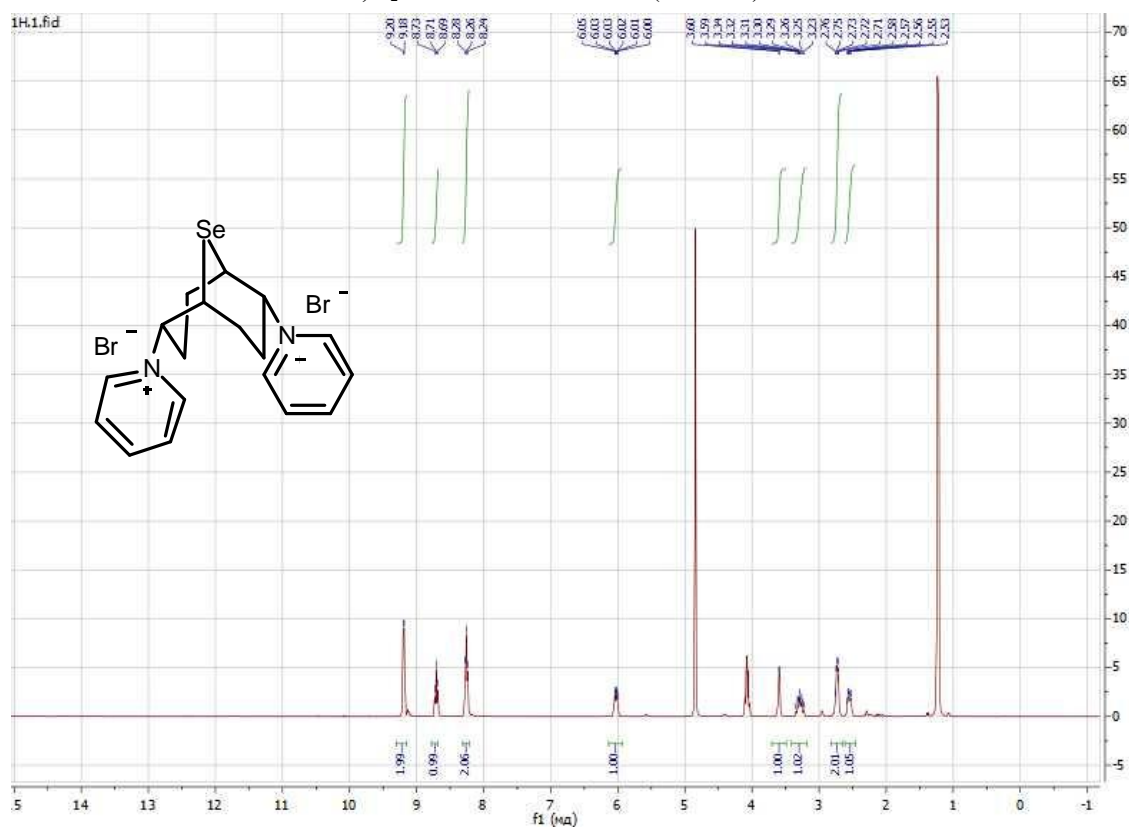

<sup>13</sup>C NMR SPECTRUM OF COMPOUND **6**, D<sub>2</sub>O REFERENCED TO i-PrOH (INTERNAL)

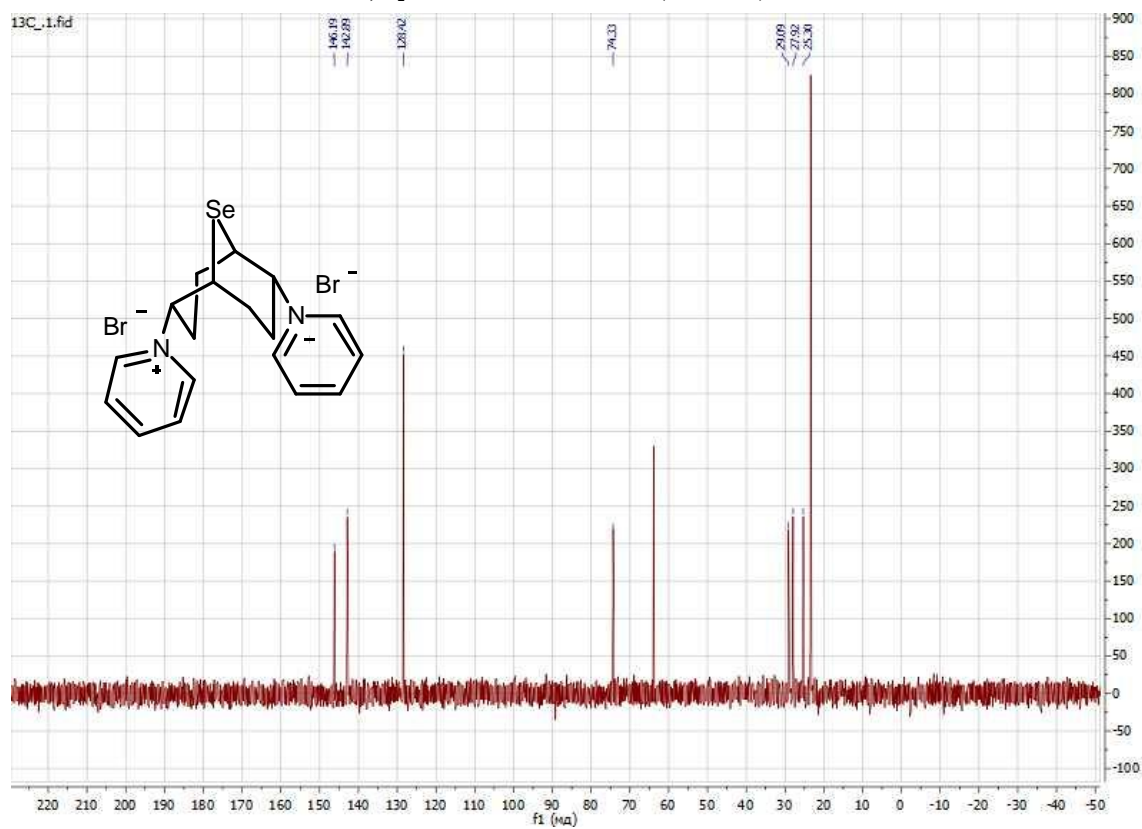

<sup>1</sup>H NMR SPECTRUM OF COMPOUND 7, CDCl<sub>3</sub>/DMSO-D<sub>6</sub>, REFERENCED TO CHLOROFORM

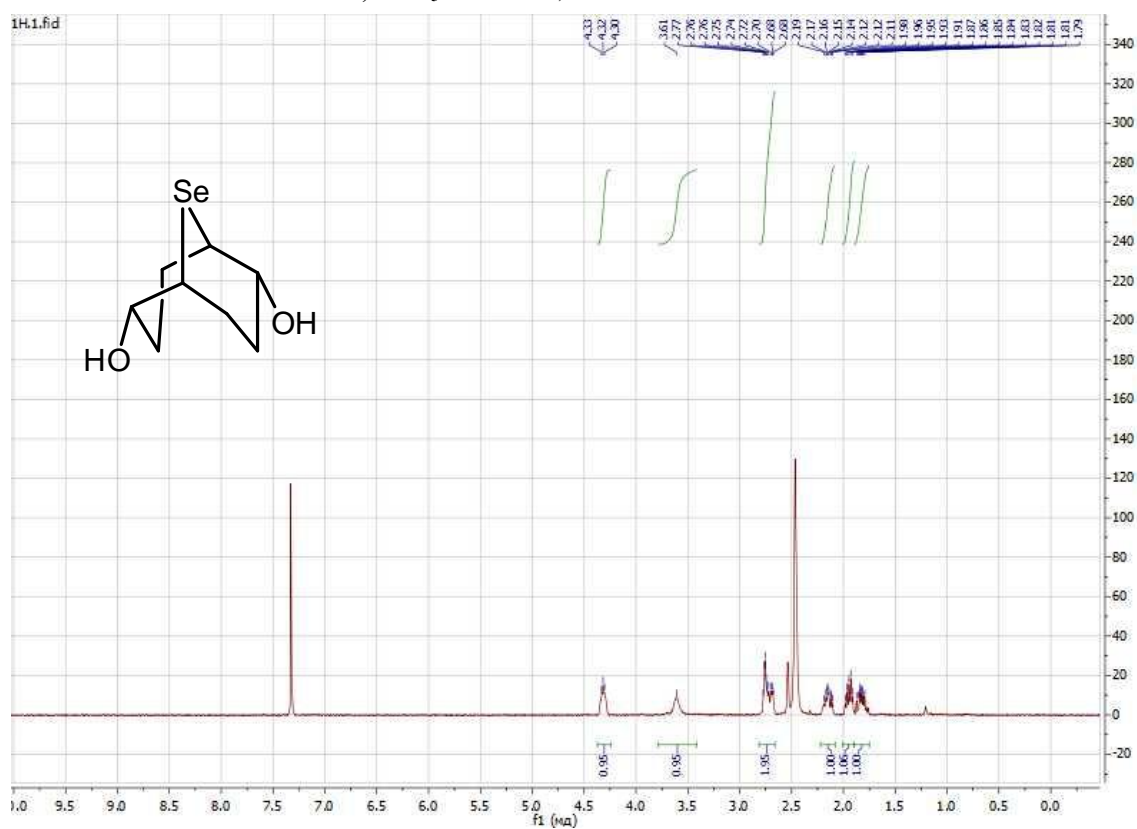

<sup>13</sup>C NMR SPECTRUM OF COMPOUND 7, CDCl<sub>3</sub>/DMSO-D<sub>6</sub>, REFERENCED TO CHLOROFORM

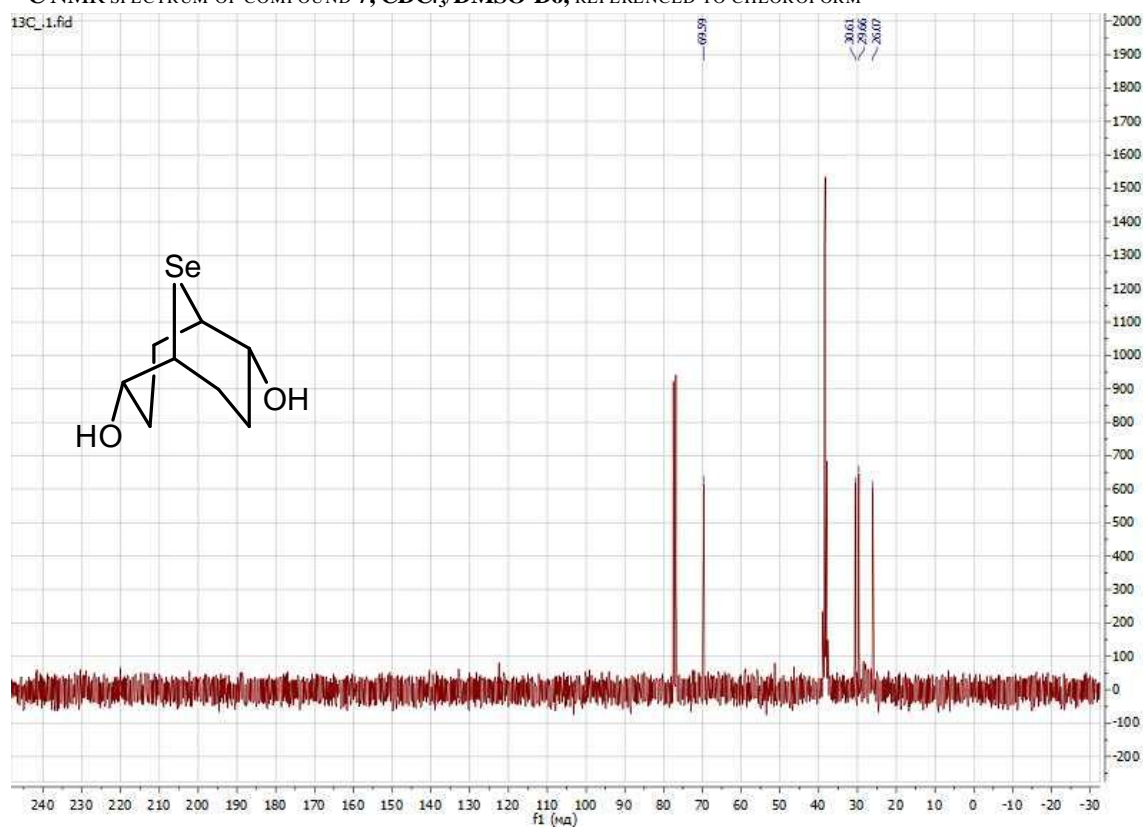

<sup>1</sup>H NMR SPECTRUM OF COMPOUND **8**, D<sub>2</sub>O REFERENCED TO i-PrOH (INTERNAL)

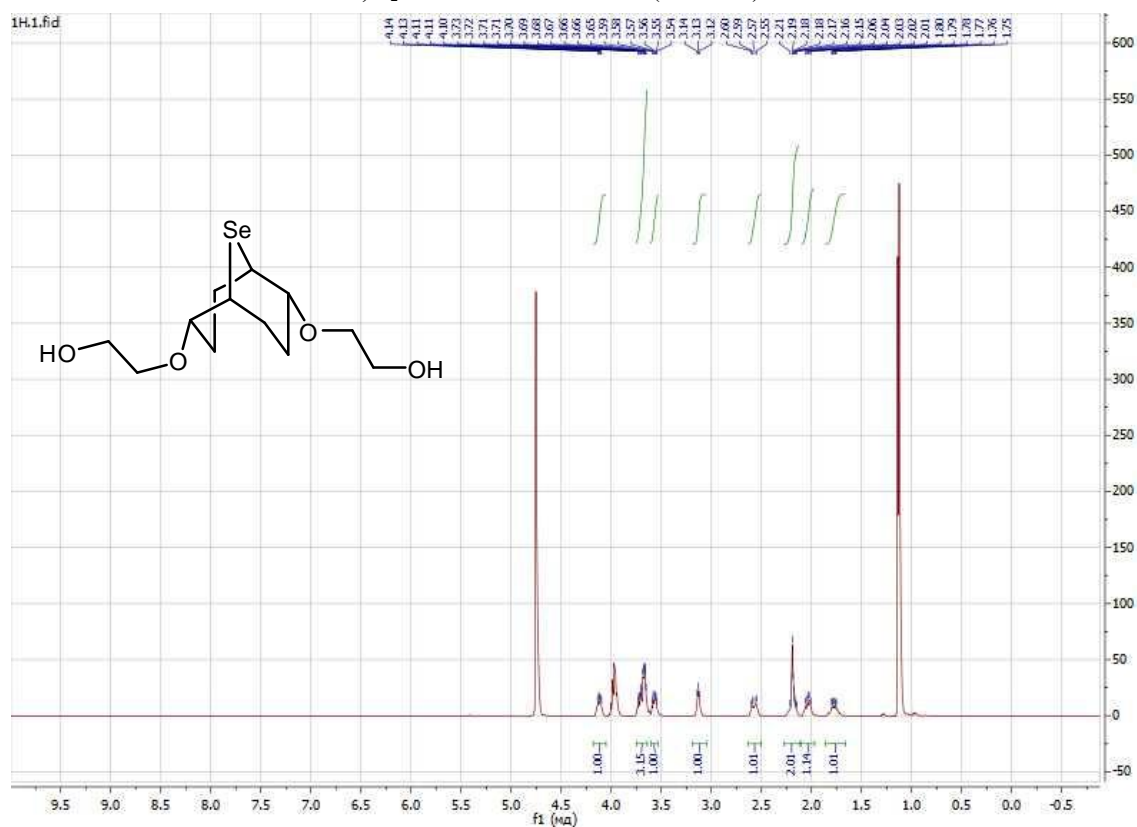

<sup>13</sup>C NMR SPECTRUM OF COMPOUND **8**, D<sub>2</sub>O REFERENCED TO i-PrOH (INTERNAL)

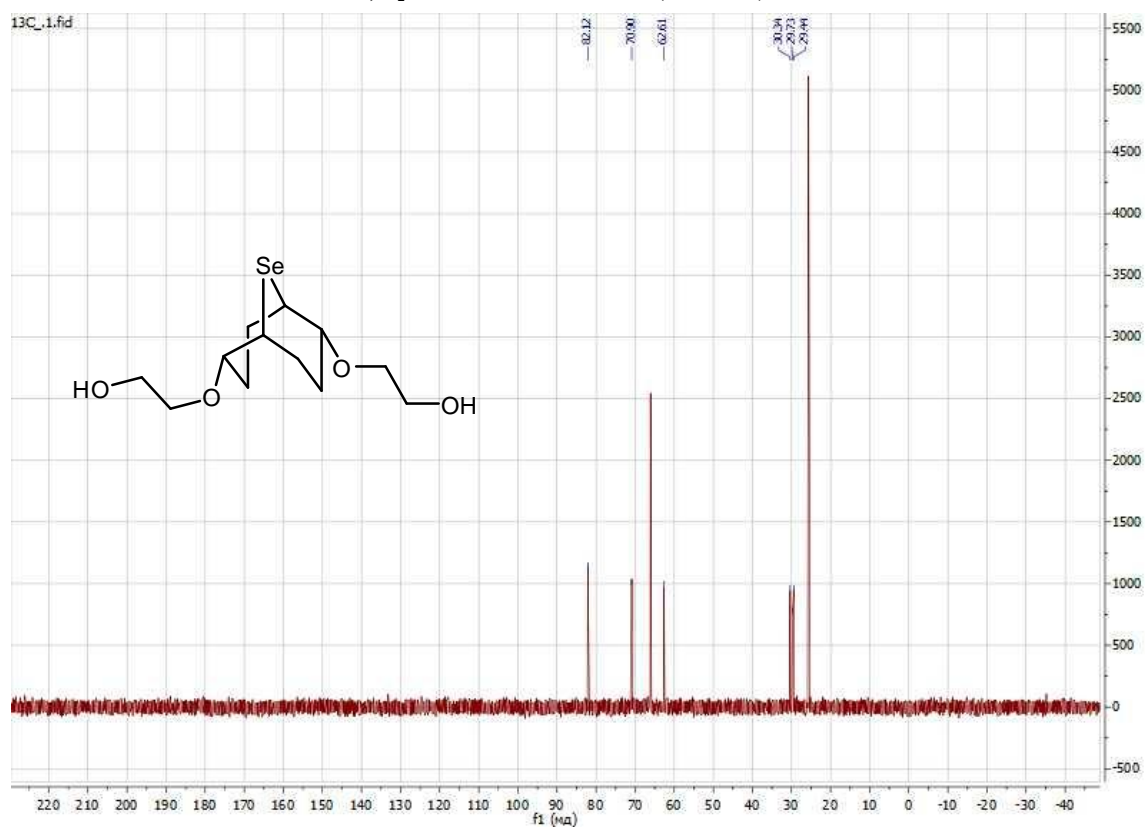

Table 1 ESM. X-ray crystallographic data for compound **5**

|                                                                             |                                                                              |
|-----------------------------------------------------------------------------|------------------------------------------------------------------------------|
| Compound                                                                    | <b>5</b>                                                                     |
| CCDC number                                                                 | <b>2277477</b>                                                               |
| Empirical formula                                                           | C <sub>12</sub> H <sub>18</sub> O <sub>4</sub> Se                            |
| Formula weight / g·mol <sup>-1</sup>                                        | 305.22                                                                       |
| Crystal system                                                              | Monoclinic                                                                   |
| Space group                                                                 | <i>C</i> 2/ <i>c</i>                                                         |
| <i>a</i> / Å                                                                | 16.778(3)                                                                    |
| <i>b</i> / Å                                                                | 10.8062(15)                                                                  |
| <i>c</i> / Å                                                                | 7.4255(11)                                                                   |
| $\alpha, \beta, \gamma$ / °                                                 | 90.00, 105.777(5), 90.00                                                     |
| Volume / Å <sup>3</sup>                                                     | 1295.6 (3)                                                                   |
| <i>Z</i>                                                                    | 4                                                                            |
| Density (calculated) / g·cm <sup>-3</sup>                                   | 1.565                                                                        |
| Absorptions coefficient / mm <sup>-1</sup>                                  | 2.899                                                                        |
| Radiation ( $\lambda$ / Å)                                                  | MoK $\alpha$ (0.71073)                                                       |
| Temperature / K                                                             | 100(2)                                                                       |
| 2 $\theta$ range / °                                                        | 2.52 – 27.55                                                                 |
| Crystal size / mm                                                           | 0.16 × 0.15 × 0.11                                                           |
| Crystal habit                                                               | colourless, prism                                                            |
| F(000)                                                                      | 624                                                                          |
| Index ranges                                                                | -21 ≤ <i>h</i> ≤ 20, -14 ≤ <i>k</i> ≤ 14, -9 ≤ <i>l</i> ≤ 9                  |
| Reflections collected                                                       | 12339                                                                        |
| Independent reflections                                                     | 1486 [ <i>R</i> <sub>int</sub> = 0.0551, <i>R</i> <sub>sigma</sub> = 0.0328] |
| Number of ref. parameters                                                   | 79                                                                           |
| <i>R</i> <sub>1</sub> / <i>wR</i> <sub>2</sub> [ <i>I</i> > 2σ( <i>I</i> )] | 0.0887 / 0.3091                                                              |
| <i>R</i> <sub>1</sub> / <i>wR</i> <sub>2</sub> (all data)                   | 0.0953 / 0.3147                                                              |
| Goodness-of-fit on <i>F</i> <sup>2</sup>                                    | 1.096                                                                        |
| Completeness [%]                                                            | 99.6                                                                         |
| Largest diff. peak and hole / e·Å <sup>-3</sup>                             | 5.94/ -0.93                                                                  |
| Weight scheme                                                               | $w=1/[\sigma^2(F_o^2)+(0.1916P)^2+56.1592P]$<br>where $P=(F_o^2+2F_c^2)/3$   |



Table S1ESM. Bond lengths, bond angles and torsion angles for compound **5**

| Bond <i>l</i> , Å |                 |           | Angle $\varphi$ , ° |     |                 |          | Torsion angle $\theta$ , ° |    |    |                 |           |
|-------------------|-----------------|-----------|---------------------|-----|-----------------|----------|----------------------------|----|----|-----------------|-----------|
| Se1               | C1              | 1.960(9)  | C1                  | Se1 | C1 <sup>1</sup> | 90.3(5)  | Se1                        | C1 | C2 | C3              | -61.1(9)  |
| Se1               | C1 <sup>1</sup> | 1.960(9)  | C5                  | O1  | C4              | 117.7(7) | Se1                        | C1 | C4 | O1              | -177.1(5) |
| O1                | C4              | 1.466(11) | C2                  | C1  | Se <sup>1</sup> | 109.9(6) | Se1                        | C1 | C4 | C3 <sup>1</sup> | 65.1(8)   |
| O1                | C5              | 1.344(10) | C2                  | C1  | C4              | 117.2(7) | C1                         | C2 | C3 | C4 <sup>1</sup> | 46.6(11)  |
| O2                | C5              | 1.213(11) | C4                  | C1  | Se1             | 107.2(6) | C2                         | C1 | C4 | O1              | 58.9(9)   |
| C1                | C2              | 1.528(12) | C1                  | C2  | C3              | 116.9(7) | C2                         | C1 | C4 | C3 <sup>1</sup> | -58.9(10) |
| C1                | C4              | 1.541(11) | C4 <sup>1</sup>     | C3  | C2              | 115.0(7) | C4                         | O1 | C5 | O2              | 0.2(12)   |
| C2                | C3              | 1.533(13) | O1                  | C4  | C1              | 108.6(6) | C4                         | O1 | C5 | C6              | 180.0(7)  |
| C3                | C4 <sup>1</sup> | 1.525(12) | O1                  | C4  | C3 <sup>1</sup> | 104.3(7) | C4                         | C1 | C2 | C3              | 61.6(11)  |
| C4                | C3 <sup>1</sup> | 1.525(12) | C3 <sup>1</sup>     | C4  | C1              | 117.4(7) | C5                         | O1 | C4 | C1              | 85.6(9)   |
| C5                | C6              | 1.488(13) | O1                  | C5  | C6              | 111.7(8) | C5                         | O1 | C4 | C3 <sup>1</sup> | -148.6(7) |
|                   |                 |           | O2                  | C5  | O1              | 123.7(8) |                            |    |    |                 |           |
|                   |                 |           | O2                  | C5  | C6              | 124.5(8) |                            |    |    |                 |           |

## Evaluation of diene conjugates

| Sample                                                                           | nmol/1g wet mass        |                        |                       | % to control            |                        |                       |
|----------------------------------------------------------------------------------|-------------------------|------------------------|-----------------------|-------------------------|------------------------|-----------------------|
|                                                                                  | 1000<br>$\mu\text{mol}$ | 100<br>$\mu\text{mol}$ | 10<br>$\mu\text{mol}$ | 1000<br>$\mu\text{mol}$ | 100<br>$\mu\text{mol}$ | 10<br>$\mu\text{mol}$ |
| H <sub>2</sub> O (control for Na <sub>2</sub> SeO <sub>3</sub> , comp. 6, 7, 8)) | 0,68±0,046              |                        |                       | 100                     |                        |                       |
| 1% Ethanol (control for Ph <sub>2</sub> Se <sub>2</sub> , comp. 1, 3, 5)         | 1,28±0,018              |                        |                       | 100                     |                        |                       |
| <u>Ref.comp.</u><br>Na <sub>2</sub> SeO <sub>3</sub>                             | 2,40±0,074              | 0,92±0,016             | 0,60±0,010            | 352±10,9                | 135±2,3                | 88±1,5                |
| comp. 6                                                                          | 1,14±0,033              | 0,45±0,015             | 0,55±0,012            | 167±4,8                 | 66±2,2                 | 80±1,8                |
| comp. 7                                                                          | 0,42±0,01               | 0,44±0,02              | 0,54±0,02             | 62±1,5                  | 64±2,9                 | 79±2,9                |
| comp. 8                                                                          | 0,65±0,04               | 0,72±0,01              | 0,64±0,02             | 95±5,9                  | 105±1,5                | 93±2,9                |
| <u>Ref.comp.</u><br>(Ph <sub>2</sub> Se <sub>2</sub> )                           | 2,95±0,103              | 1,36±0,033             | 1,01±0,010            | 230±8,1                 | 106±2,5                | 78±0,8                |
| comp. 1                                                                          | 1,03±0,01               | 1,04±0,10              | 0,75±0,06             | 80±0,8                  | 81±7,8                 | 59±4,7                |
| comp. 3                                                                          | 1,05±0,005              | 1,40±0,032             | 0,66±0,068            | 82±0,4                  | 109±2,5                | 52±5,4                |
| comp. 5                                                                          | 1,34±0,08               | 1,13±0,01              | 1,20±0,007            | 105±6,3                 | 88±0,8                 | 93±0,6                |

## Glutathione reductase activity

| Sample                                                                           | Activity,<br>mmol min <sup>-1</sup> mg <sup>-1</sup> |           |           | % to control |          |          |
|----------------------------------------------------------------------------------|------------------------------------------------------|-----------|-----------|--------------|----------|----------|
|                                                                                  | 1000 µmol                                            | 100 µmol  | 10 µmol   | 1000 µmol    | 100 µmol | 10 µmol  |
| H <sub>2</sub> O (control for Na <sub>2</sub> SeO <sub>3</sub> , comp. 6, 7, 8)) | 2,06±0,28                                            |           |           | 100          |          |          |
| 1% Ethanol (control for Ph <sub>2</sub> Se <sub>2</sub> , comp. 1, 3, 5          | 2,84±0,48                                            |           |           | 100          |          |          |
| <u>Ref.comp.</u><br>Na <sub>2</sub> SeO <sub>3</sub>                             | 4,23±0,96                                            | 6,70±1,17 | 2,16±0,47 | 205±46,6     | 325±56,9 | 105±22,9 |
| comp. 6                                                                          | 8,39±1,41                                            | 3,61±1,10 | 1,58±0,40 | 407±68,0     | 175±53,4 | 77±19,5  |
| comp. 7                                                                          | 2,2±0,4                                              | 2,3±0,4   | 3,3±0,3   | 121±22,0     | 111±19,3 | 160±14,6 |
| comp. 8                                                                          | 3,1±0,6                                              | 2,5±0,1   | 4,4±0,2   | 151±29,3     | 121±4,8  | 213±9,6  |
| <u>Ref.comp.</u><br>(Ph <sub>2</sub> Se <sub>2</sub> )                           | 4,32±0,75                                            | 3,93±0,76 | 3,96±0,69 | 152±26,4     | 138±26,6 | 140±24,4 |
| comp. 1                                                                          | 3,0±0,4                                              | 0,6±0,4   | 0,5±0,3   | 104±13,8     | 22±14,3  | 18±1,1   |
| comp. 3                                                                          | 1,08±0,32                                            | 1,74±0,35 | 2,40±0,33 | 38±11,2      | 61±12,3  | 85±11,7  |
| comp. 5                                                                          | 1,2±0,4                                              | 3,0±1,3   | 2,2±0,3   | 43±14,3      | 105±45,5 | 77±10,5  |

## Glutathion peroxidase activity

| Sample                                                                           | Activity,<br>mmol min <sup>-1</sup> mg <sup>-1</sup> |           |           | % to control |          |          |
|----------------------------------------------------------------------------------|------------------------------------------------------|-----------|-----------|--------------|----------|----------|
|                                                                                  | 1000 µmol                                            | 100 µmol  | 10 µmol   | 1000 µmol    | 100 µmol | 10 µmol  |
| H <sub>2</sub> O (control for Na <sub>2</sub> SeO <sub>3</sub> , comp. 6, 7, 8)) | 8,59±0,34                                            |           |           | 100          |          |          |
| 1% Ethanol (control for Ph <sub>2</sub> Se <sub>2</sub> , comp. 1, 3, 5          | 8,61±0,68                                            |           |           | 100          |          |          |
| <u>Ref.comp.</u><br>Na <sub>2</sub> SeO <sub>3</sub>                             | 6,84±0,33                                            | 6,30±0,31 | 5,90±0,04 | 80±3,8       | 73±56,9  | 67±0,5   |
| comp. 6                                                                          | 5,06±0,22                                            | 5,0±0,31  | 5,78±0,21 | 59±2,5       | 58±3,6   | 67±2,4   |
| comp. 7                                                                          | 10,1±0,86                                            | 13,7±1,17 | 12,2±0,11 | 118±10,0     | 160±13,6 | 143±1,3  |
| comp. 8                                                                          | 11,4±0,24                                            | 9,2±0,02  | 26,1±0,66 | 133±2,8      | 107±0,2  | 304±7,6  |
| <u>Ref.comp.</u><br>(Ph <sub>2</sub> Se <sub>2</sub> )                           | 8,25±0,28                                            | 9,31±0,67 | 9,41±0,11 | 96±3,3       | 108±7,8  | 109±1,3  |
| comp. 1                                                                          | 15,4±0,87                                            | 7,4±0,43  | 9,0±0,2   | 179±10,0     | 86±5,0   | 104±2,9  |
| comp. 3                                                                          | 10,08±0,39                                           | 9,08±0,89 | 9,3±0,15  | 117±4,6      | 105±10,3 | 108±1,7  |
| comp. 5                                                                          | 6,1±0,02                                             | 8,9±0,94  | 10,9±1,12 | 71±0,2       | 104±11,0 | 127±13,1 |

## References

1. Dolomanov O.V., Bourhis L.J., Gildea R.J., Howard, J.A.K. & Puschmann, H. A Complete Structure Solution, Refinement and Analysis Program. *J. Appl. Crystallography* 2009, **42**, 339. Doi: 10.1107/S0021889808042726
2. Sheldrick G.M. A short history of SHELX, *Acta Crystallographica Section A. Foundations and Advances* 2008, **A64**, 112. Doi: 10.1107/S0108767307043930
3. Dorofeev, N.V.; Bojarkin, E.V.; Peshkova, A.A. Factors Defining Field Germination of Oilseed Radish Seeds. *J. Stress Phys. Biochem.* 2013, **9**, 159–168.
4. Bradford, M. A rapid and sensitive method for the quantitation of microgram quantities of protein utilizing the principle of protein-dye binding. *Anal. Biochem.* 1976, **72**, 248–254.
5. Nigmatullina, L.R.; Rumyantseva, N.I.; Kostyukova, Y.A. The effect of D,L-buthionine-S,R-sulfoximine on the ratio of glutathione forms and the growth of Tatar buckwheat calli. *Ontogenesis* 2014, **45**, 50–62..
6. Placer, Z. Lip peroxidation systeme im biologischen material. *Nahrung* 1968, **12**, 679–684.
7. Ahmad, P.; Hashem, A.; Abd-Allah, E.F.; Alqarawi, A.A.; John, R.; Egamberdieva, D.; Gucel, S. Role of *Trichoderma harzianum* in mitigating NaCl stress in Indian mustard (*Brassica juncea* L.) through antioxidative defense system. *Front. Plant Sci.* 2015, **6**, 868–883.
